# Supplementary material for: Primary Patient-Derived Cancer Cells and Their Potential for Personalized Cancer Patient Care
Source: Cell Rep. 2017 Dec 12;21(11):3298–309. doi: 10.1016/j.celrep.2017.11.051 (PMC5745232; doi:10.1016/j.celrep.2017.11.051)
Supplement: Document S1. Figures S1–S4 and Tables S1–S9 [file mmc1.pdf]

**Supplemental Information**

**Primary Patient-Derived Cancer Cells and Their  
Potential for Personalized Cancer Patient Care**

**David P. Kodack, Anna F. Farago, Anahita Dastur, Matthew A. Held, Leila Dardaei, Luc Friboulet, Friedrich von Flotow, Leah J. Damon, Dana Lee, Melissa Parks, Richard Dicecca, Max Greenberg, Krystina E. Kattermann, Amanda K. Riley, Florian J. Fintelmann, Coleen Rizzo, Zofia Piotrowska, Alice T. Shaw, Justin F. Gainor, Lecia V. Sequist, Matthew J. Niederst, Jeffrey A. Engelman, and Cyril H. Benes**

## Supplemental Information

### Supplemental Tables

**Table S1. Success of Breast Cancer Cell Line Generation by Subtype. Related to Table 1.**

| Breast Cancer Subtype   | Number Finished | Number Failed | Total Processed | Percent Successful |
|-------------------------|-----------------|---------------|-----------------|--------------------|
| Basal (ER-, PR-, HER2-) | 2               | 7             | 9               | 22                 |
| Luminal                 | 11              | 72            | 83              | 13                 |

**Table S2. Subjective Reasons for the Failure of Cancer Cell Line Generation. Related to Table 1.**

| Failure Reason                                    | Number of Failures | Percent of Failures |
|---------------------------------------------------|--------------------|---------------------|
| No/few cancer cells identified after dissociation | 221                | 77                  |
| Stroma outgrowth                                  | 41                 | 14                  |
| Cancer cells died/didn't proliferate              | 24                 | 8                   |

**Table S3. Success of Lung Cancer Cell Line Generation by Tissue Type. Related to Table 1.**

| Tissue Type      | Number Finished | Number Failed | Percent Successful |
|------------------|-----------------|---------------|--------------------|
| Core Biopsy/ FNA | 43              | 141           | 23                 |
| Pleural Effusion | 56              | 76            | 42                 |
| Resection        | 5               | 9             | 36                 |
| Autopsy          | 3               | 20            | 13                 |

**Table S4. Success of Lung Cancer Cell Line Generation by Biopsy Site. Related to Table 1.**

| Biopsy Site | Number Finished | Number Failed | Percent Successful |
|-------------|-----------------|---------------|--------------------|
| Lung        | 16              | 48            | 25                 |
| Liver       | 15              | 27            | 36                 |
| Lymph Node  | 2               | 12            | 14                 |
| Bone        | 1               | 1             | 50                 |

**Table S5. Analysis of Feeder+TCM Culture Compared to All Other Culture Conditions (R10, D10, ACL4<5 or ACL4≥5) within Each Tissue Type for All Finished Lung Cancer Cell Lines Grown in Multiple Conditions. Related to Table 1.** Data shown as a percent and total number in parentheses.

| Tissue Type       | Percent Success of Feeder+TCM (number) | Percent Success of Any Other Media (number) | Percent Success of Both (number) | Total |
|-------------------|----------------------------------------|---------------------------------------------|----------------------------------|-------|
| Core Biopsy/ FNA  | 46 (12)                                | 23 (6)                                      | 31 (8)                           | 26    |
| Pleural Effusion  | 35 (9)                                 | 19 (5)                                      | 46 (12)                          | 26    |
| Resection/Autopsy | 22 (2)                                 | 33 (3)                                      | 44 (4)                           | 9     |
| Total             | 37 (23)                                | 22 (14)                                     | 41 (24)                          | 61    |

**Table S6. Comparison of the Ability of the Indicated Antibodies to Identify Epithelial Cancer Cells. Related to Figures 1-2.** CK, Cytokeratin; EPCAM, Epithelial cell adhesion molecule; \* denotes cells that have undergone epithelial-to-mesenchymal transition; -, no staining; +/-, minimal staining; +, low staining; ++, moderate staining; +++, strong staining

| Cell line Identifier       | Cancer Type | Pan-CK clones AE1/AE3 | Pan-CK clone MNF116 | CK5/6 | CK7 | CK8/18 | CK20 | EPCAM | Pan-CK clone CAM5.2 | E-cadherin |
|----------------------------|-------------|-----------------------|---------------------|-------|-----|--------|------|-------|---------------------|------------|
| Human foreskin fibroblasts | -           | -                     | -                   | -     | -   | -      | +/-  | -     | +/-                 |            |
| PC-9                       | lung        | ++                    | +++                 | -     | +++ | +++    | -    | +/-   | ++                  | +/-        |
| H1650                      | lung        | +                     | ++                  | -     | +++ | +++    | -    | +/-   | ++                  | +/-        |
| A549                       | lung        | +                     | ++                  | -     | ++  | +++    | -    | +     | +                   | +/-        |
| H1975                      | lung        | ++                    | +                   | -     | +++ | ++     | -    | -     |                     | +          |
| H1975-R2*                  | lung        | +                     | +/-                 | -     | ++  | +      | -    | -     |                     | +/-        |
| MGH048                     | lung        | +/-                   | ++                  | -     | +/- | +++    | -    | +/-   | +/-                 | -          |
| MGH065*                    | lung        | -                     | -                   | -     | -   | ++     | -    | -     |                     | -          |
| MGH068                     | lung        | ++                    | +                   |       | +   | +++    |      |       | +/-                 |            |
| MGH084                     | lung        | +++                   | +/-                 | -     | ++  | +++    | -    |       |                     |            |
| MGH092                     | lung        | ++                    | ++                  | -     | +++ | +++    | -    | ++    |                     |            |
| MGH121                     | lung        | +                     | ++                  | -     | ++  | +++    | -    | +/-   | +                   | +/-        |
| MGH134                     | lung        | +                     | ++                  | -     | ++  | +++    | -    | +/-   | +                   | +/-        |
| MGH157                     | lung        | +                     | ++                  | -     | ++  | +++    | -    | +/-   | +                   | +/-        |
| MGH174                     | lung        | +                     | +                   | -     | +   | ++     | -    | +/-   |                     |            |
| MGH505                     | lung        | +/-                   | +/-                 |       | +/- | +/-    | -    |       |                     |            |
| MGH707                     | lung        | +                     | +/-                 | -     | ++  | +++    | -    | +/-   |                     |            |
| MGH712                     | lung        | +/-                   | ++                  | -     | +++ | +++    | -    | +     |                     |            |
| MGH722                     | lung        | +                     | ++                  | -     | +++ | +++    | -    | +/-   |                     |            |
| MGH732                     | lung        | +/-                   | +/-                 | -     | ++  | ++     | -    | +/-   |                     |            |
| MGH748                     | lung        | +/-                   | +                   | -     | -   | +++    | -    | +/-   | +/-                 | -          |
| MGH757                     | lung        | +/-                   | +/-                 | -     | ++  | +      | -    |       |                     |            |
| MGH778                     | lung        | +/-                   | +/-                 | -     | +/- | +      | -    |       |                     |            |
| MGH781                     | lung        | +                     | +/-                 | -     | +/- | ++     | -    |       |                     |            |
| MGH785                     | lung        | +/-                   | +                   | -     | +   | +      | -    |       |                     |            |
| MGH6007                    | lung        | +/-                   | +/-                 | -     | +/- | +      | -    |       |                     |            |
| MGH6009                    | lung        | +                     | +/-                 | -     | ++  | +++    | -    | -     |                     |            |
| MGH902                     | lung        | +/-                   | +/-                 |       | +/- | ++     |      |       | +/-                 |            |
| MGH334                     | breast      | +/-                   | +/-                 | -     | +/- | +++    | -    |       |                     |            |
| MGH421                     | breast      | +/-                   | ++                  | -     | ++  | +++    | -    | +     |                     |            |
| MGH345                     | bladder     | +                     | ++                  | -     | +/- | ++     | -    | +/-   |                     |            |
| MGH620                     | colorectal  | +/-                   | +                   | -     | -   | ++     |      |       |                     |            |
| MGH616                     | colorectal  | ++                    | +/-                 | -     | -   | +++    | +/-  | +++   |                     |            |
| MGH603                     | colorectal  | -                     | -                   | -     | -   | ++     | +/-  | ++    |                     |            |
| MGH211                     | colorectal  | +/-                   | -                   | -     | -   | +++    | +    | +++   |                     |            |
| MGH439                     | gallbladder | +/-                   | +/-                 | -     | +/- | ++     | -    |       |                     |            |

**Table S7. Ability of the CK8/18 Antibody Cocktail to Stain Cancer Cells. Related to Figures 1-2. +, low staining; ++, moderate staining; +++, strong staining**

| Cell line Identifier | Cancer Type    | CK8/18 score |
|----------------------|----------------|--------------|
| 1A6                  | bladder        | ++           |
| HT-1197              | bladder        | ++           |
| T24                  | bladder        | +++          |
| UACC893              | breast         | +++          |
| BT483                | breast         | +++          |
| HDQ-P1               | breast         | +++          |
| COLO-206F            | intestine      | +++          |
| COLO-320             | intestine      | ++           |
| C170                 | intestine      | ++           |
| H2170                | lung, squamous | ++           |
| H520                 | lung, squamous | ++           |
| SW900                | lung, squamous | ++           |
| H1694                | SCLC           | +            |
| H1092                | SCLC           | +++          |
| H2061                | SCLC           | ++           |
| HT-29                | CRC            | +++          |
| HCT116               | CRC            | +++          |
| COLO-326             | CRC            | ++           |
| AsPC-1               | pancreas       | ++           |
| BxPC-3               | pancreas       | ++           |
| PANC-1               | pancreas       | +++          |
| SK-MEL-3             | melanoma       | +            |
| SK-MEL-28            | melanoma       | +            |
| WM164                | melanoma       | +            |

**Table S8. Culture information of *EGFR*-mutant and *ALK*-translocated early biopsy cultures. Related to Figures 3-5.** Time to viable freeze of 6-cm culture dish when approximately >70% confluent (in weeks), and the approximate cancer cell number and total cell number at time of the assay are given.

| <b>MGH ID</b> | <b>Time to Freeze (weeks)</b> | <b>Approximate Cancer Cell Number and Total Cell Number (millions)</b> |
|---------------|-------------------------------|------------------------------------------------------------------------|
| MGH707-1      | 17                            | 3 (5.1)                                                                |
| MGH721-1      | 15                            | 1 (3.4)                                                                |
| MGH748-1      | 9                             | 2 (2)                                                                  |
| MGH832-1      | 8                             | 4 (4)                                                                  |
| MGH021-2      | 13                            | 4 (4)                                                                  |
| MGH051-1      | 20                            | 3 (3)                                                                  |
| MGH092-1      | 16                            | 1 (1)                                                                  |

**Table S9. Primary culture time frame. Related to Figures 3-5.** Time to viable freeze of 6-cm culture dish when approximately >70% confluent (in days) and sample type for each primary cell model are shown. \* denotes multiple samples from the same patient.

| MGH ID    | Sample Type | Time to Freeze (days) |
|-----------|-------------|-----------------------|
| MGH023-2  | Biopsy      | 58                    |
| MGH034-2  | Biopsy      | 150                   |
| MGH044-1  | Biopsy      | 251                   |
| MGH045-1* | Resection   | 311                   |
| MGH045-2* | Fluid       | 27                    |
| MGH048-1* | Fluid       | 68                    |
| MGH048-4* | Fluid       | 14                    |
| MGH048-5* | Fluid       | 57                    |
| MGH049-1  | Fluid       | 96                    |
| MGH051-2  | Biopsy      | 31                    |
| MGH056-1  | Biopsy      | 112                   |
| MGH064-1  | Fluid       | 97                    |
| MGH065-1* | Biopsy      | 36                    |
| MGH065-3* | Biopsy      | 13                    |
| MGH068-2  | Biopsy      | 19                    |
| MGH073-1* | Fluid       | 21                    |
| MGH075-2* | Fluid       | 71                    |
| MGH075-3* | Fluid       | 68                    |
| MGH083-3  | Fluid       | 28                    |
| MGH084-1  | Biopsy      | 90                    |
| MGH085-1  | Fluid       | 111                   |
| MGH092-1  | Biopsy      | 113                   |
| MGH1088-1 | Fluid       | 80                    |
| MGH119-2  | Biopsy      | 50                    |
| MGH121-2  | Fluid       | 166                   |
| MGH143-3  | Biopsy      | 55                    |
| MGH144-1  | Fluid       | 28                    |
| MGH148-3  | Fluid       | 81                    |
| MGH164-1* | Fluid       | 128                   |
| MGH164-2* | Fluid       | 21                    |
| MGH164-3* | Resection   | 28                    |
| MGH177-1  | Fluid       | 22                    |
| MGH180-1  | Biopsy      | 41                    |
| MGH212-1  | Fluid       | 27                    |
| MGH306-1  | Biopsy      | 43                    |
| MGH308-1  | Biopsy      | 99                    |
| MGH503-1  | Fluid       | 37                    |
| MGH505-1  | Fluid       | 56                    |

|          |           |     |
|----------|-----------|-----|
| MGH700-2 | Biopsy    | 42  |
| MGH706-2 | Biopsy    | 47  |
| MGH707-1 | Biopsy    | 119 |
| MGH707-2 | Biopsy    | 50  |
| MGH709-1 | Biopsy    | 226 |
| MGH709-2 | Biopsy    | 67  |
| MGH712-1 | Resection | 141 |
| MGH721-1 | Biopsy    | 104 |
| MGH725-1 | Biopsy    | 204 |
| MGH741-1 | Fluid     | 77  |
| MGH744-1 | Fluid     | 57  |
| MGH748-1 | Biopsy    | 64  |
| MGH754-2 | Biopsy    | 22  |
| MGH800-1 | Biopsy    | 13  |
| MGH802-2 | Biopsy    | 42  |
| MGH805-1 | Biopsy    | 163 |
| MGH809-1 | Biopsy    | 42  |
| MGH810-1 | Fluid     | 7   |
| MGH814-1 | Biopsy    | 79  |
| MGH830-1 | Biopsy    | 92  |
| MGH902-1 | Biopsy    | 57  |
| MGH908-2 | Fluid     | 374 |
| MGH920-1 | Fluid     | 31  |
| Average  |           | 81  |

## Supplemental Figures

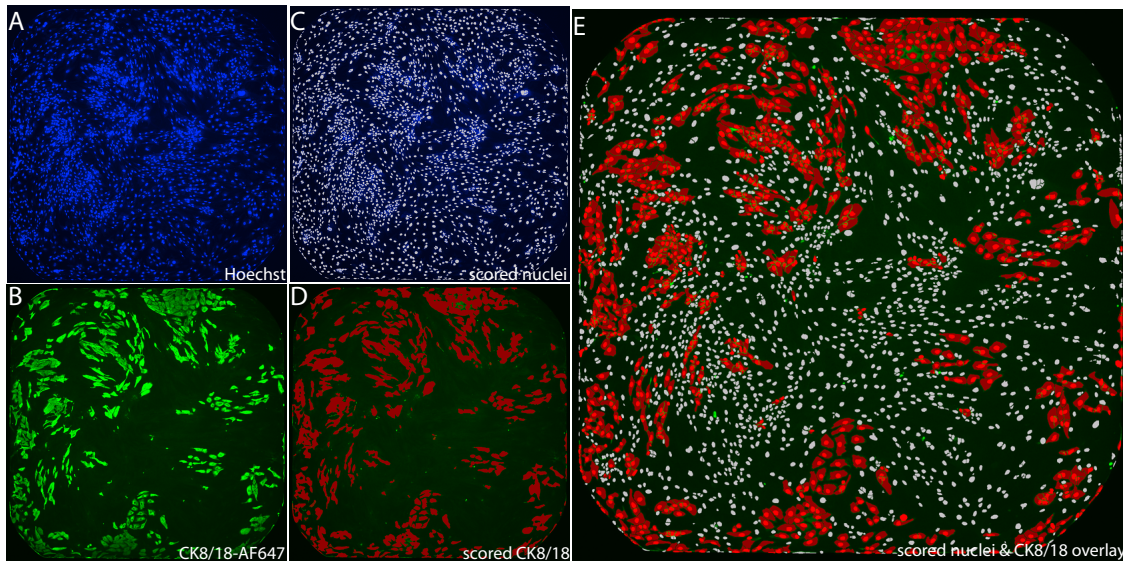

**Figure S1. MetaExpress Cell Scoring Image Analysis of Hoechst- and CK8/18-Alexa647-Stained Primary Lung Tumor Cultures. Related to Figures 1-5.** MGH721-1 biopsy culture was grown in a single well of a 384-well plate, fixed and stained with the rabbit anti-CK8/18 antibody followed by an Alexa Fluor-647-conjugated anti-rabbit IgG (B, green) and Hoechst 33342 (A, blue) as described in the Materials and Methods. Images were taken with Molecular Devices' Image Express Micro. Molecular Devices' MetaExpress software was used to score Hoechst-positive nuclei (C, white) and CK8/18-positive cytoplasm (D, red). The composite image of CK8/18-positive nuclei (red) and CK8/18-negative nuclei (white) is shown in E.

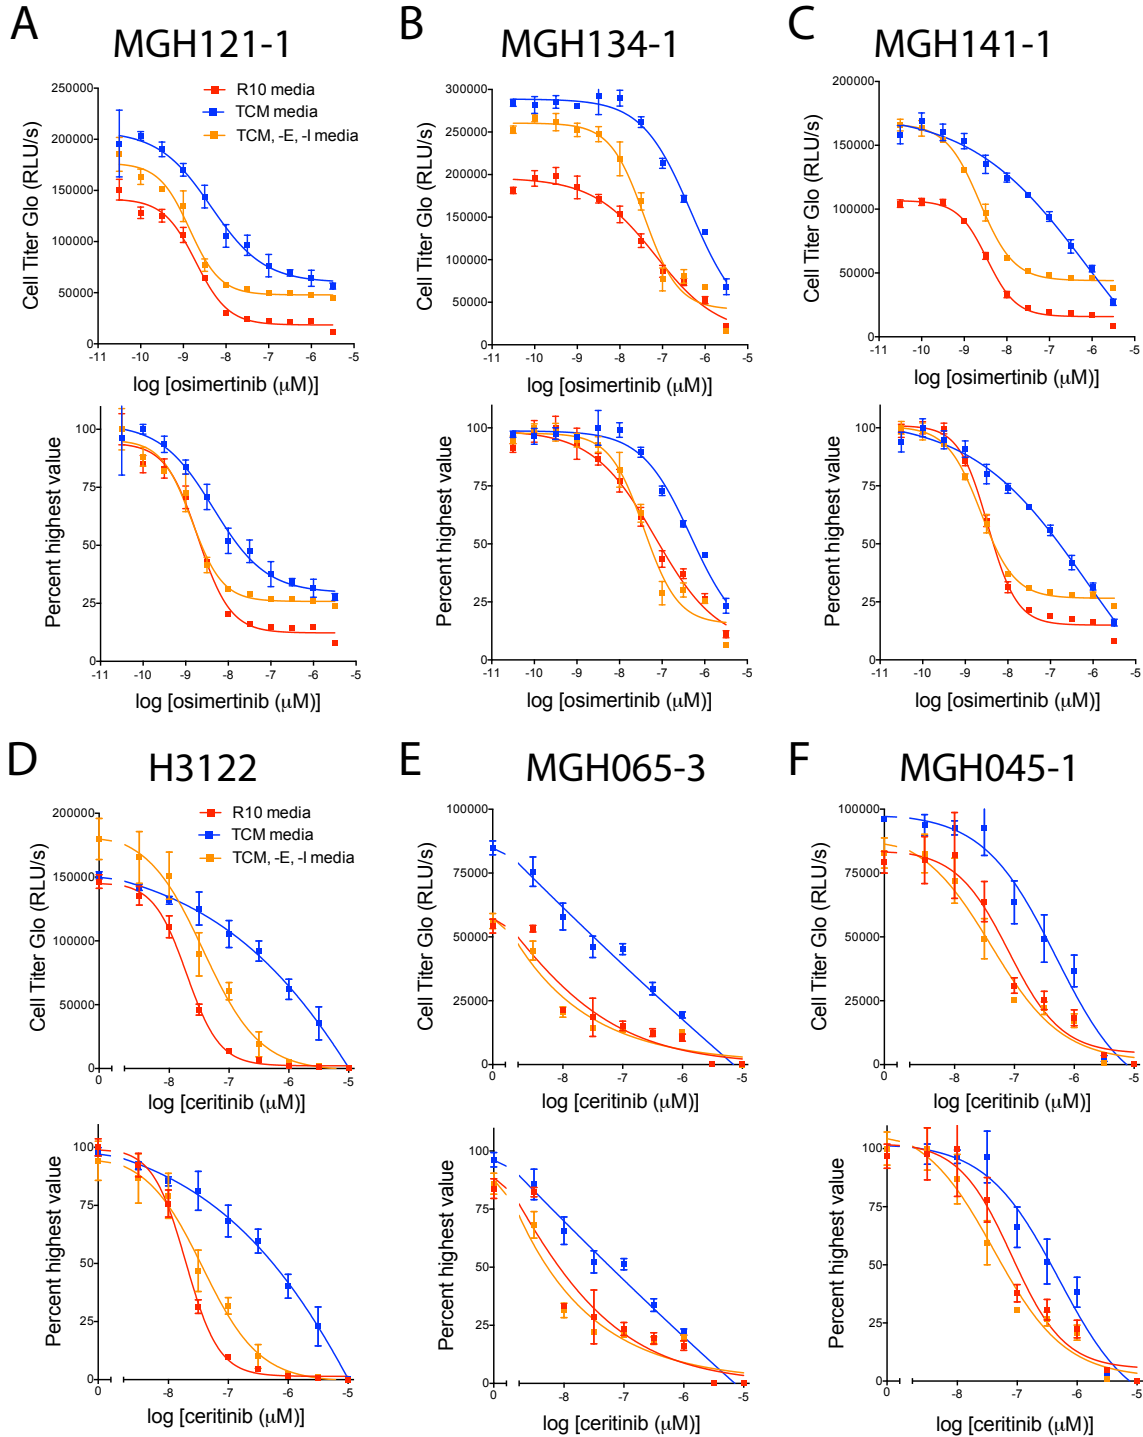

**Figure S2. Sensitivity of *EGFR*-mutant (A-C) and *ALK*-translocated (D-F) lung cancer cells treated with *EGFR* or *ALK* inhibitors, respectively, growing in R10, TCM or TCM, -E, -I media. Related to Figure 2.** Patient-derived *EGFR*-mutant (A-C) or *ALK*-translocated (B-C) lung cancer cells growing in R10 media (red curves), TCM media (blue curves) or TCM, -E, -I media (orange curves) in 384-well plates were treated with nine doses of the *EGFR* inhibitor osimertinib or the *ALK* inhibitor ceritinib for 4-7 days. Cell Titer-Glo reagent was used to measure cell viability. Raw relative light units per second (RLU/s) are illustrated on the top graphs and normalized values (percent highest) are depicted on the bottom. Data are represented as mean  $\pm$  SD with n=4 replicate wells.

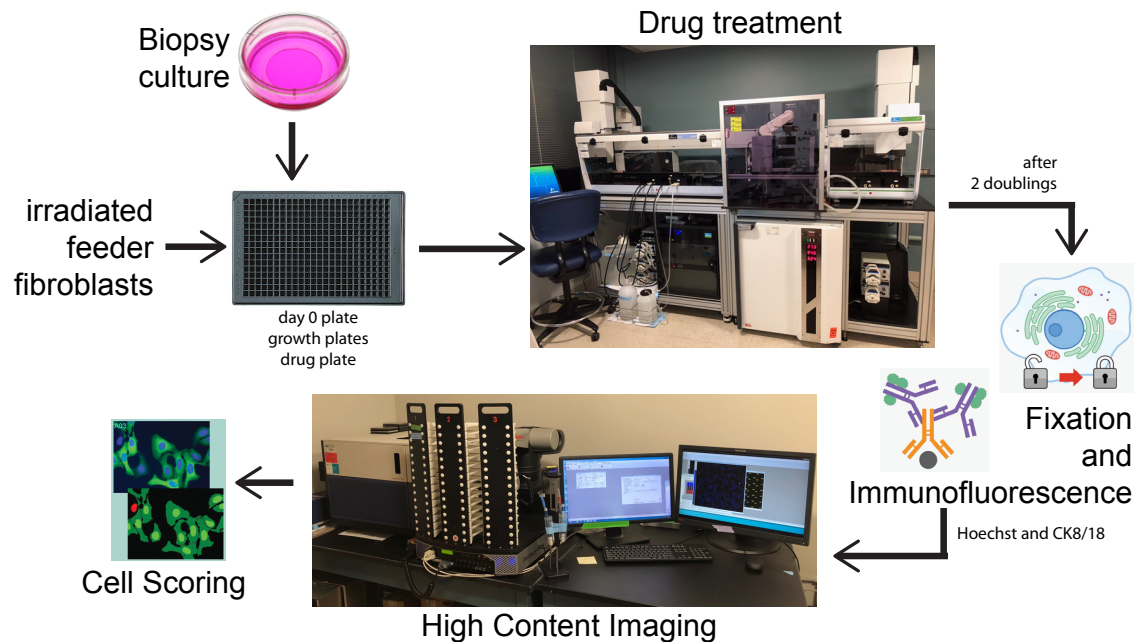

**Figure S3. Schematic of the FAsT workflow. Related to Figures 3-5.** Prior to plating early biopsy cultures, a monolayer of irradiated feeder fibroblasts was established in 384-well plates. Patient-derived culture plates included day 0 (fix at day of treatment initiation), a drug plate and growth plates. The drug plate consisted of a 10-dose treatment of both the targeted therapy of resistance, the subsequent prescribed targeted therapy, and a drug assumed to have no activity – for example, an ALK inhibitor in *EGFR*-mutant cancer cells, and vice-versa. Each dose entailed four wells. Growth plates allowed for the monitor of cells within the culture, and therefore determined when to stop the drug plate, preferable after two cancer cell doublings. After drug plate fixation, immunofluorescence was performed with the primary rabbit anti-CK8/18 antibody cocktail, secondary goat anti-rabbit IgG-AlexaFluor 684 antibody and Hoechst 33342. 384-well plates were imaged using Molecular Devices' Image Xpress Micro high content imager, and cell scoring was accomplished with their MetaExpress software.

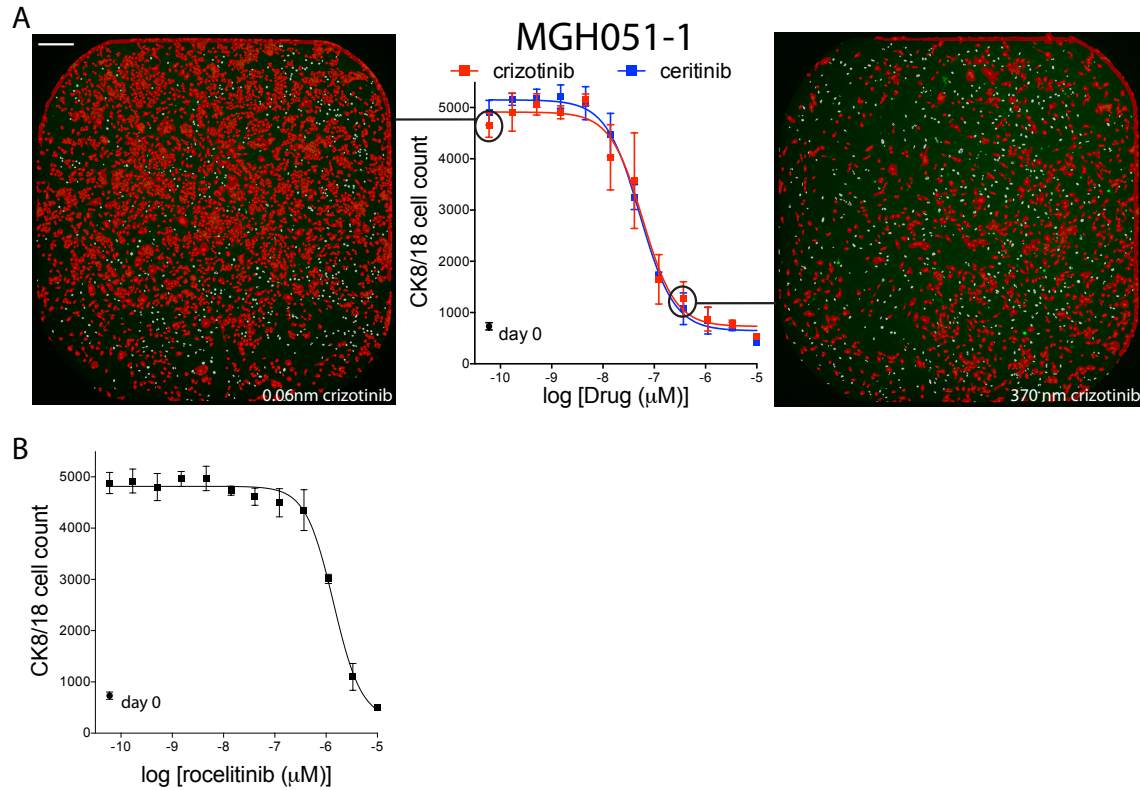

**Figure S4. Response of *ALK*-mutant biopsy culture MGH051-1 to *ALK* inhibitors (A) or an *EGFR* inhibitor. Related to Figure 5.** The early biopsy culture of *ALK*-translocated lung cancer MGH051-1 was plated on a monolayer of ~500 irradiated feeder fibroblasts in TCM, -E, -I media in 384-well plates, and treated with twelve doses of the *ALK* inhibitors crizotinib or ceritinib (A), or the *EGFR* inhibitor rociletinib (B) for 6 days. Plates were fixed and stained with Hoechst 33342 and the anti-CK8/18 antibody to determine the change in CK8/18-positive cell number. Black circles indicate cell number at day of treatment initiation (day 0). Representative images of a low and high dose of crizotinib are shown. Data are represented as mean  $\pm$  SD with  $n=4$  replicate wells. Scale bar is 270  $\mu\text{m}$ .
